# Supplementary material for: Bisphosphonates and evidence for association with esophageal and gastric cancer: a systematic review and meta-analysis
Source: HighWire-hosted journal article supplement (doi:10.1136/bmjopen-2014-007133), 2015-12-01

**Supplementary Figure 1: Funnel Plot of the studies examining bisphosphonates and UGI cancer**

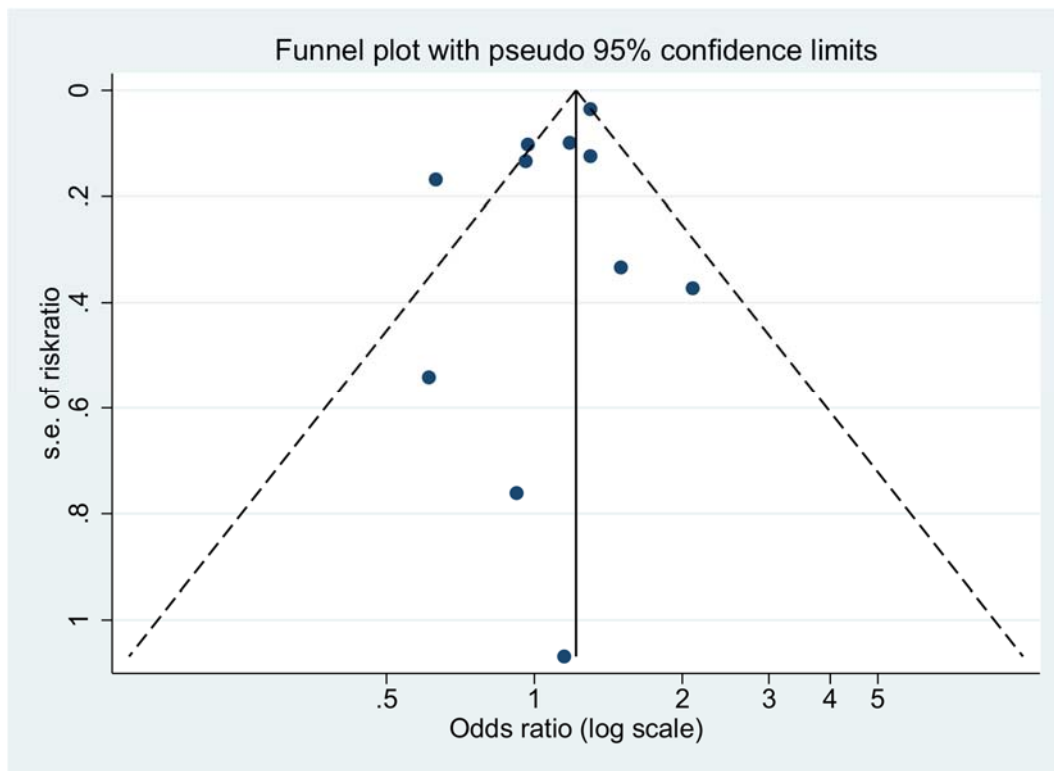

**Supplementary Figure 2.1: Meta-analysis of risk of oesophageal cancer with any bisphosphonate – sensitivity analysis (1)**

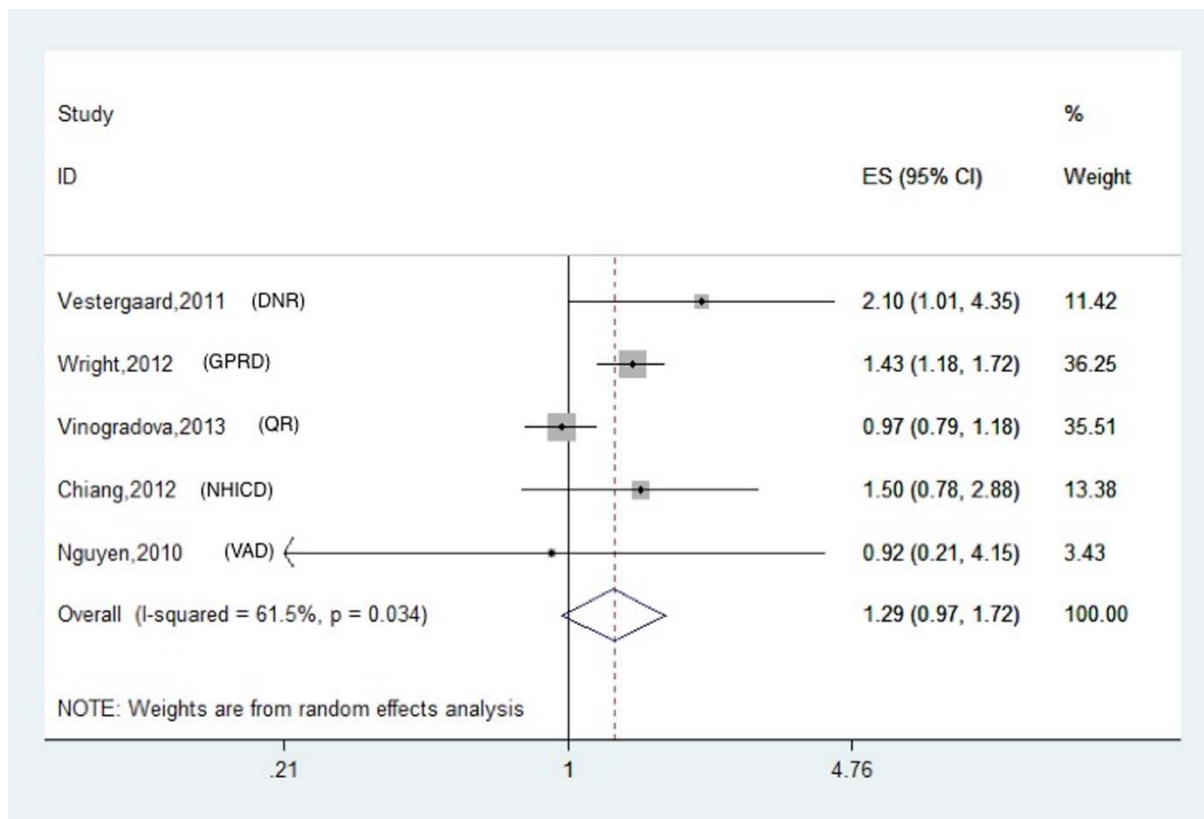

**Supplementary Figure 2.2: Meta-analysis of risk of oesophageal cancer with any bisphosphonate – sensitivity analysis (2)**

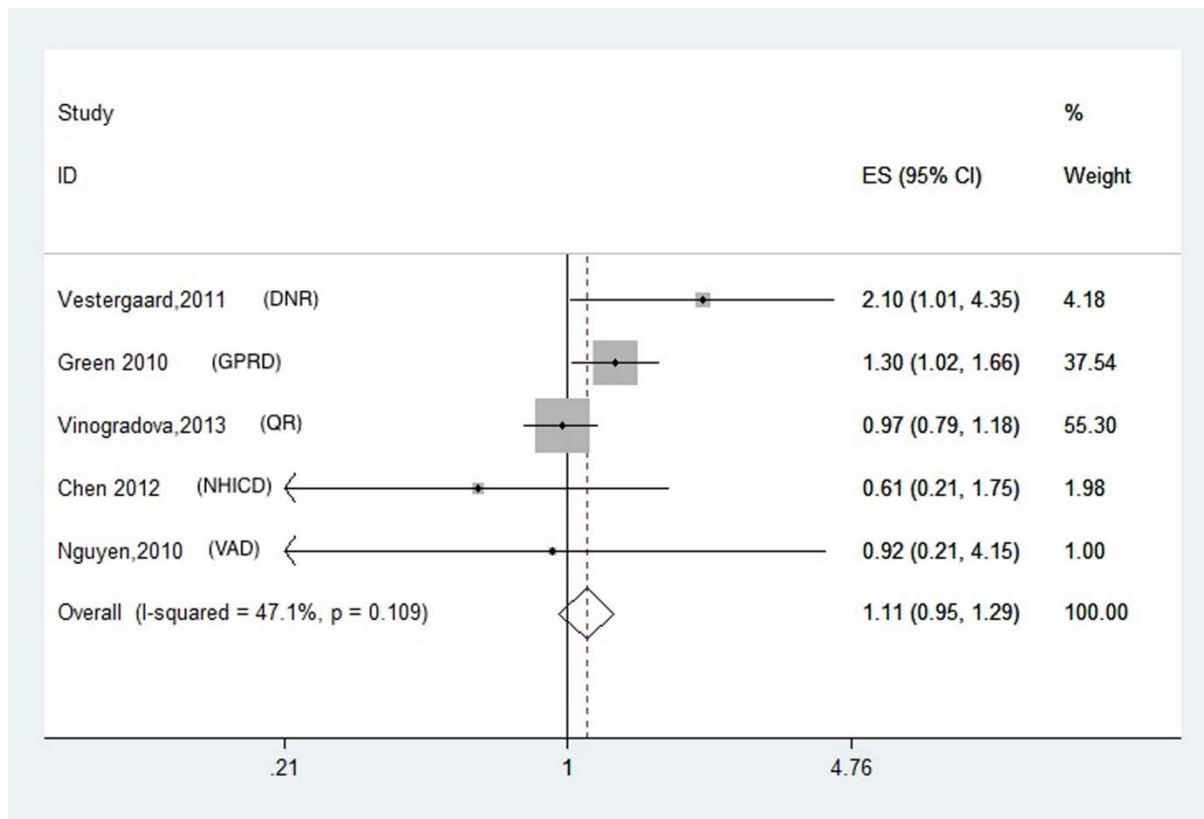

**Supplementary Figure 2.3: Meta-analysis of risk of oesophageal cancer with any bisphosphonate – sensitivity analysis (3)**

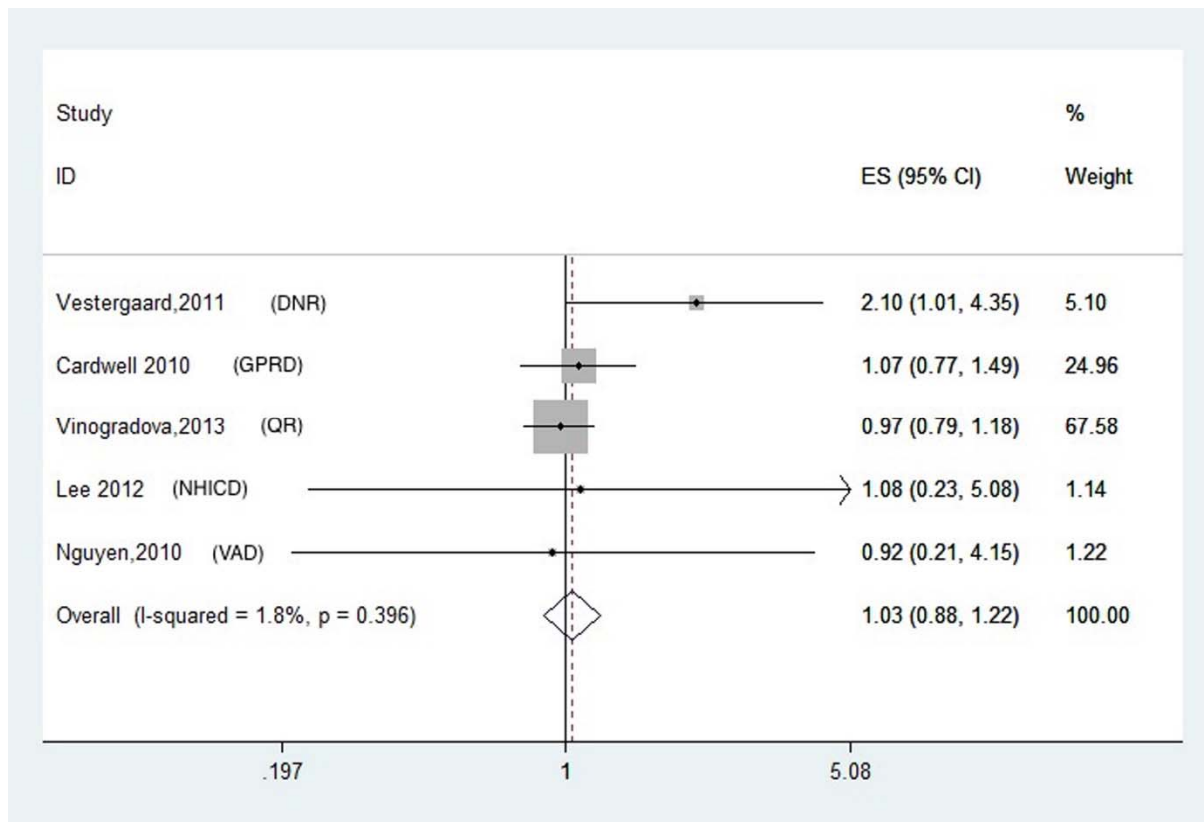

**Supplementary Figure 4.1: Meta-analysis of risk of oesophageal cancer with alendronate – sensitivity analysis (1)**

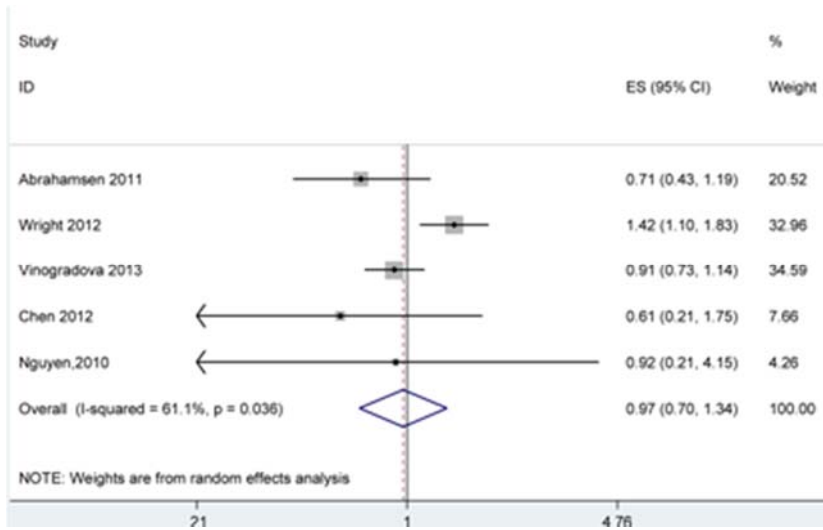

**Supplementary Figure 4.2: Meta-analysis of risk of oesophageal cancer with alendronate – sensitivity analysis (2)**

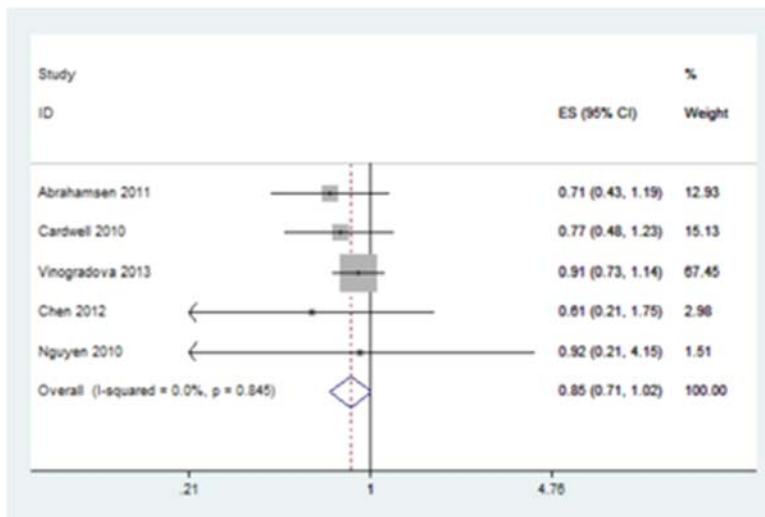

**Supplementary Figure 4.3: Meta-analysis of risk of oesophageal cancer with alendronate – sensitivity analysis (3)**

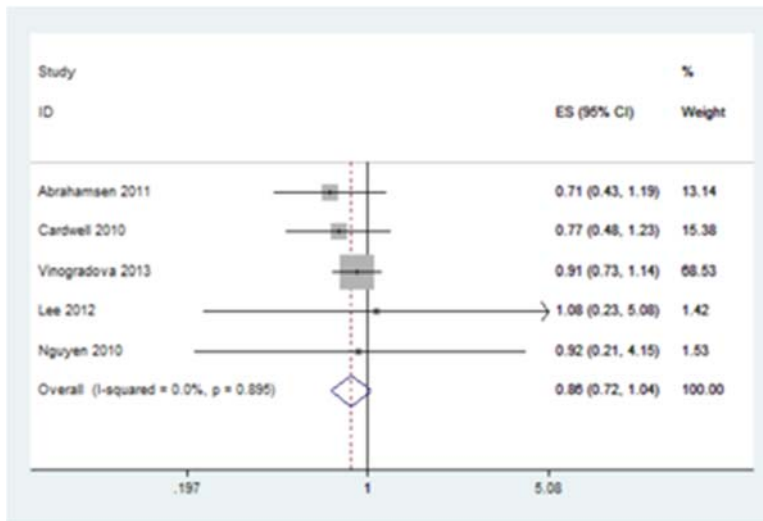

### Supplementary Figure 5: Meta-analysis of risk of gastric cancer with alendronate

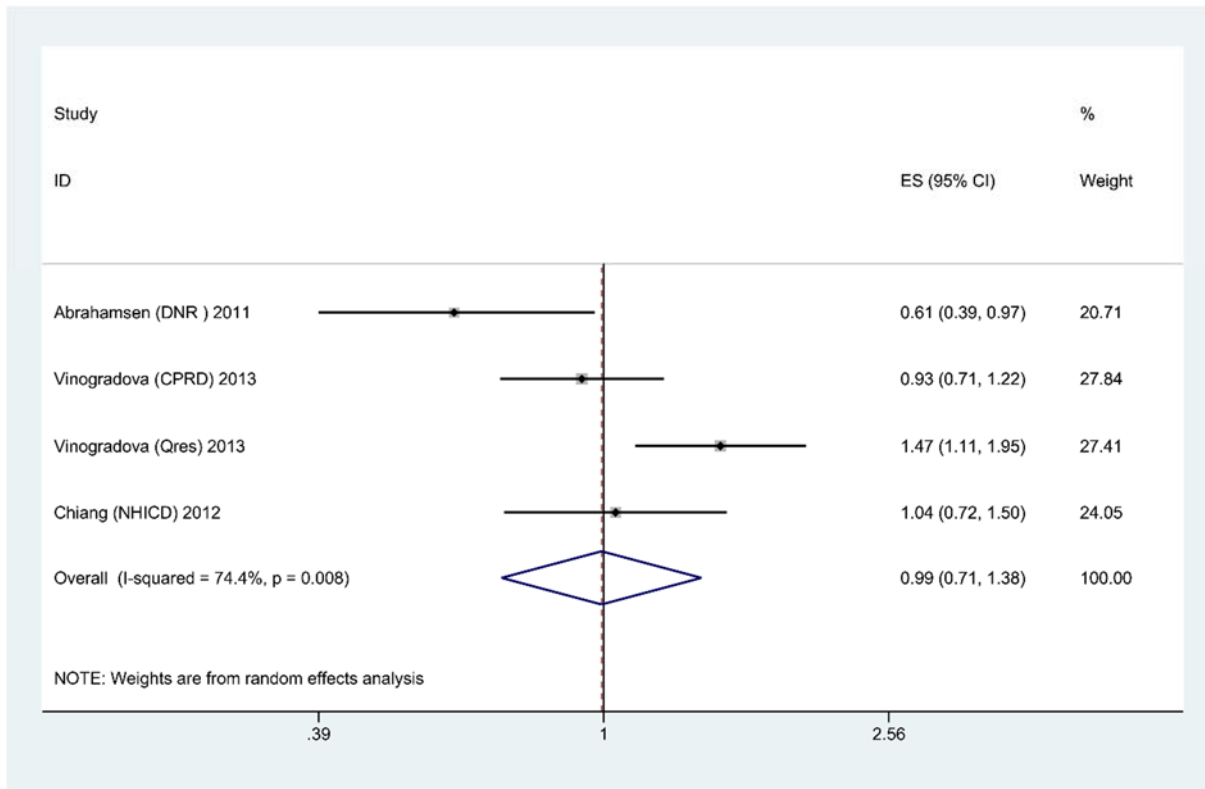

**Supplementary Figure 6: Meta-analysis of cohort studies – UGI cancer and bisphosphonates**

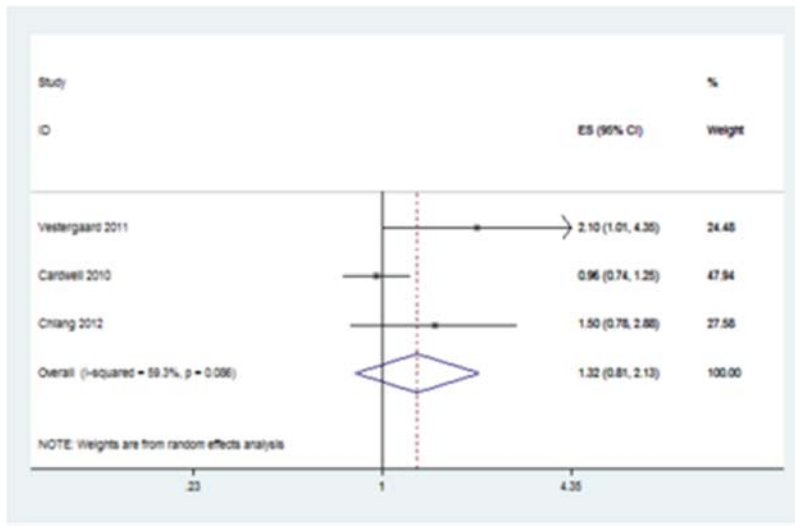

**Supplementary Figure 7: Meta-analysis of case control studies – UGI cancer and bisphosphonates**

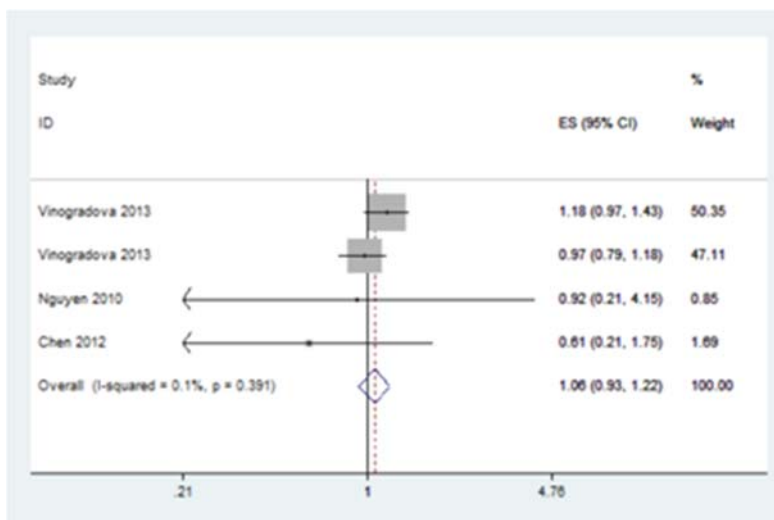

Supplement: bmjopen-2014-007133supp_figures.pdf [file bmjopen-2014-007133supp_figures.pdf]
